# Supplementary material for: Temporal progression along discrete coding states during decision-making in the mouse gustatory cortex
Source: PLOS journal article supplement (doi:10.1371/journal.pcbi.1010865), 2023-02-07
Supplement: S1 (10.1371/journal.pcbi.1010865.s001) [file journal.pcbi.1010865.s001]

## CLASSIFICATION OF HIDDEN STATES

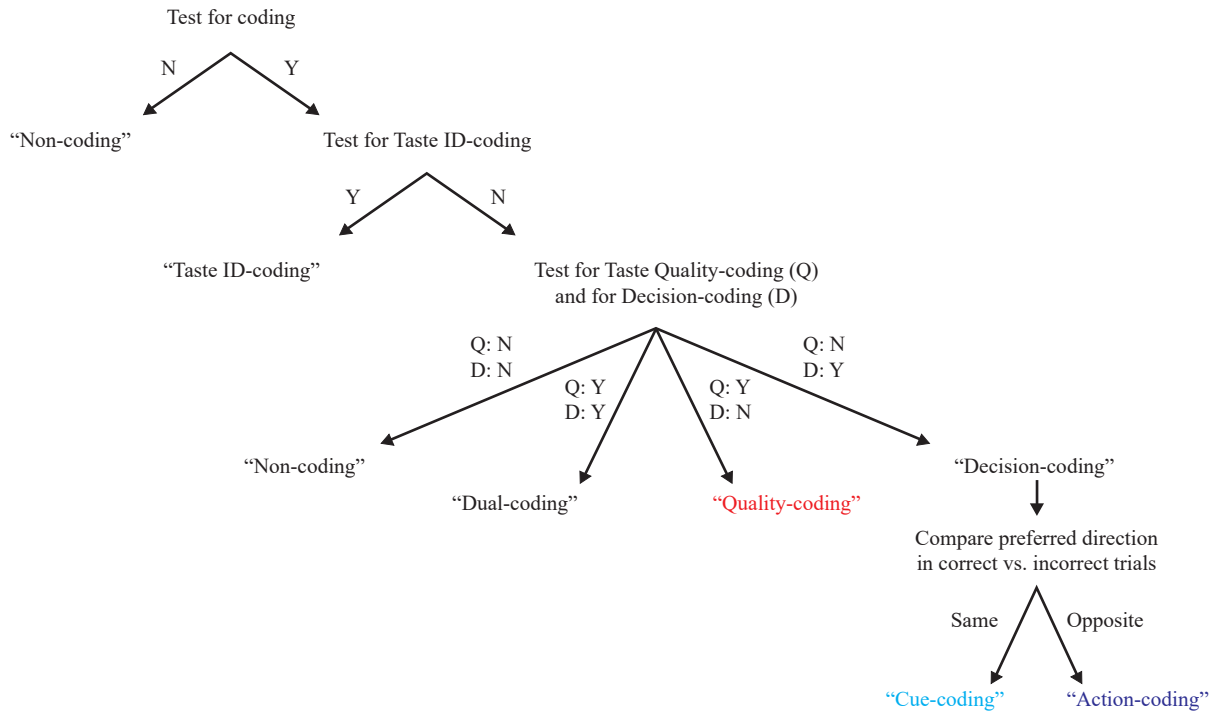

**S1 Fig. Pipeline for classification of HMM states.** Given a state  $S$ , the probability of observing  $S$  in a correctly performed trial was compared across the four trial types using a Chi-squared test. If the result was not significant (N),  $S$  was labeled “Non-coding.” Otherwise (Y), all six pairwise Marascuilo post-hoc tests were performed. If there was exactly one trial type for which all post-hoc tests involving it were significant (Y),  $S$  was labeled “Taste ID-coding.” Otherwise (N), the four trial types were grouped in two orthogonal ways: sweet (sucrose and maltose) and bitter (quinine and sucrose octaacetate), and cue left (sucrose and quinine) and cue right (maltose and sucrose octaacetate). Two additional Chi-squared tests were run: one to compare the probability of observing  $S$  in correctly performed trials between the sweet and bitter categories, and another to compare the probability of observing  $S$  in correctly performed trials between the cue left and cue right categories. These two tests are run independently, leading to four possible significance outcomes. If neither test was significant,  $S$  was labeled “Non-coding.” If both tests were significant,  $S$  was labeled “Dual-coding.” If the sweet vs. bitter test was significant and the cue left vs. cue right test was not,  $S$  was labeled “Quality-coding.” If the sweet vs. bitter test was not significant and the cue left vs. cue right test was,  $S$  was labeled “Decision-coding,” but could be further classified by examining its frequency of occurrence in correctly vs. incorrectly performed trials. If the cued direction for which  $S$  was more likely to be observed in correctly performed trials was the same for incorrectly performed trials (referred to as the “preferred direction” for  $S$  in correct and incorrect trials),  $S$  was labeled “Cue-coding.” If the preferred directions in correct and incorrect trials were opposite,  $S$  was labeled “Action-coding.”
